# Supplementary material for: Effects of CO 2 on the nitrogen isotopic composition of Trichodesmium and Crocosphaera
Source: Copernicus journal article supplement (doi:10.5194/egusphere-2024-775), 2024-03-19
Supplement: Supplementary file 2 [file SM_DATA.xlsx]

## Sheet: DATA
Number	Species	Treatment pCO2 (ppm)	Replicate	Growth rate (d-1)	N2 fixation rate (nmol N µg Chla-1 h-1) or (fmol N Cell-1 h-1)	δ15N (‰)	NifH abundance (pmol μg protein-1)	Nitrogenase acitivity effiency (mol N mol NifH-1 min-1 )
1	Trichodesmium	180	1	0.484	9.34202	-2.46169	0.530311	34.8834
2	Trichodesmium	180	2	0.474	9.06494	-2.11369	0.41355	43.4056
3	Trichodesmium	180	3	0.494	8.94017	-1.75669	0.386144	45.8464
4	Trichodesmium	280	1	0.502	10.0575	-1.73669	0.314709	63.283
5	Trichodesmium	280	2	0.487	10.1095	-1.49769	0.319447	62.6669
6	Trichodesmium	280	3	0.534	9.71403	-1.48669	0.41124	46.7749
7	Trichodesmium	380	1	0.516	10.6998	-1.01569	0.309414	68.4773
8	Trichodesmium	380	2	0.552	10.253	-1.24669	0.294801	68.8702
9	Trichodesmium	380	3	0.542	10.8172	-0.981692	0.410805	52.1421
10	Trichodesmium	1000	1	0.454	8.75784	-3.01569	0.6925	25.043
11	Trichodesmium	1000	2	0.471	8.63319	-2.92069	0.531506	32.1641
12	Trichodesmium	1000	3	0.489	9.26634	-2.56669	0.726162	25.2687
13	Trichodesmium	1400	1	0.437	7.5049	-3.08769	0.689599	21.5505
14	Trichodesmium	1400	2	0.462	7.63477	-3.01969	0.550805	27.4478
15	Trichodesmium	1400	3	0.444	8.02236	-3.19369	0.895965	17.7305
16	Crocosphaera	180	1	0.47	1.01131	-2.22467	0.980395	15.9187
17	Crocosphaera	180	2	0.477	1.10873	-2.28667	0.667559	25.6308
18	Crocosphaera	180	3	0.503	1.1234	-1.98367	0.696652	24.8853
19	Crocosphaera	280	1	0.494	1.14493	-1.63367	0.508027	34.779
20	Crocosphaera	280	2	0.499	1.08947	-1.87367	0.717362	23.437
21	Crocosphaera	280	3	0.504	1.14554	-1.67967	0.563725	31.3593
22	Crocosphaera	380	1	0.535	1.2623	-1.20467	0.390418	49.8949
23	Crocosphaera	380	2	0.523	1.24372	-0.846333	0.422223	45.4575
24	Crocosphaera	380	3	0.537	1.34081	-0.714333	0.592528	34.9208
25	Crocosphaera	1000	1	0.469	0.810643	-2.62467	1.23931	10.0942
26	Crocosphaera	1000	2	0.449	0.820071	-2.43367	0.869555	14.5539
27	Crocosphaera	1000	3	0.427	0.809368	-2.63367	1.42804	8.74643
28	Crocosphaera	1400	1	0.406	0.456329	-3.70067	1.24871	5.63953
29	Crocosphaera	1400	2	0.398	0.512445	-3.50267	0.944717	8.37086
30	Crocosphaera	1400	3	0.417	0.449737	-3.58667	1.53325	4.5266
